## CORRESPONDENCE

Anesthesiology  
1998; 88:271  
© 1998 American Society of Anesthesiologists, Inc.  
Lippincott-Raven Publishers

### No Difference between Remifentanyl and Fentanyl in Patients Undergoing Craniotomy

*To the Editor:*—I read with interest the excellent clinical investigation of remifentanyl and fentanyl in patients undergoing craniotomy for supratentorial space-occupying lesions, although I am troubled by the authors' recommendations that "remifentanyl appears to be a reasonable alternative to fentanyl" and "appears appropriate" in such cases.

The authors report that induction hemodynamics, intracranial pressure, and cerebral perfusion pressure were similar, as was the median time to extubation. There was no difference in the incidence of nausea or neurologic sequelae. Anesthetic recovery, as evaluated by anesthesiologists, was not significantly different, although one patient in the remifentanyl group exhibited emergence delirium. Also, postoperative systolic blood pressure and analgesic requirements were greater in the remifentanyl group. The only negative association with fentanyl was the frequency of naloxone utilization.<sup>1</sup> I would thus conclude that presently there is no indication to use remifentanyl instead of fentanyl. This does not even consider the extensive experience that exists with fentanyl and neurosurgery patients or the issue of cost.<sup>2,3</sup>

As has been discussed recently in the literature, physicians should decide whether the relationship between investigators and sponsor affected interpretation of the results.<sup>4</sup> This study has an acknowl-

edged relationship with Glaxo Wellcome, Inc., which produces remifentanyl, and raises this issue.

**Roland R. Rizzi, M.D.**

Department of Anesthesiology  
Lenox Hill Hospital  
100 East 77th Street  
New York, New York 10021-1883  
mdski@msn.com

### References

1. Guy J, et al: Comparison of remifentanyl and fentanyl in patients undergoing craniotomy for supratentorial space-occupying lesions. *ANESTHESIOLOGY* 1997; 86:514-24
2. Todd MM, et al: A prospective comparative trial of three anesthetics for supratentorial craniotomy. *ANESTHESIOLOGY* 1993; 78:1005-20
3. From RP, et al: A double-blind comparison of alfentanil, fentanyl, and sufentanil. *ANESTHESIOLOGY* 1990; 73:896-904
4. Todd MM, Saidman LJ: Academic-industrial relationships: The good, the bad, and the ugly. *ANESTHESIOLOGY* 1997; 87:197-200

(Accepted for publication August 6, 1997.)

Anesthesiology  
1998; 88:271-2  
© 1998 American Society of Anesthesiologists, Inc.  
Lippincott-Raven Publishers

*In Reply:*—We are grateful for comments regarding the execution of our protocol.<sup>1</sup> The goal of that study was to examine the efficacy and safety of remifentanyl in neuroanesthetic practice. The study was designed when factors such as cumulative effects of long-term remifentanyl infusions (which would occur during complex craniotomies) were unknown. We generally agree with the characterization of our results with one exception. Remifentanyl-treated patients required postoperative analgesia earlier than did those receiving fentanyl, but incidence of postoperative analgesic requirement did not differ between groups.

New drugs have been and will continue to be introduced into the practice of anesthesia. Specific examination of the pharmacokinetic and pharmacodynamic properties of any new drug should be obtained in patient populations having unique anesthetic requirements. All anesthetics carry risk. Therefore, interpretation of the effects of a new drug should be made in the context of properties of established agents. This explains our choice of fentanyl-based anesthesia as the comparator group.

Remifentanyl proved to be efficacious during neuroanesthesia (a fact unknown before the execution of this protocol). Outcome, to the extent that it was measured, was generally similar for the two opioids. The only logical conclusion is that remifentanyl (when administered appropriately)

can be substituted for fentanyl with an apparently similar efficacy and safety profile in this patient population. A Phase IV trial examining a far larger population of neurosurgical patients is being conducted to confirm this with respect to relative frequency of adverse events.

Numerous factors other than safety are involved in the decision to select one agent over another. Such factors include cost, convenience, reliability, tradition, and familiarity with the agent. Those factors were not examined in our trial because of practical limitations (e.g., difficulty in quantifying those end-points) and because we believed those factors to be of secondary importance during an initial investigation. In reality, the final verdict regarding appropriate use of a compound does not occur during highly structured clinical trials but rather during routine use by regular anesthesiologists who weigh the above factors and actually make the selection. We hope that we have contributed a scientific basis to that process.

**John Guy, M.D.**

Department of Anesthesiology  
Duke University Medical Center  
Durham, North Carolina 27710



## CORRESPONDENCE

**Bradley J. Hindman, M.D.**

Department of Anesthesia  
University of Iowa College of Medicine  
Iowa City, Iowa 52242

**William L. Young, M.D.**

Department of Anesthesiology  
College of Physicians and Surgeons  
Columbia University  
New York, New York 10032

**David S. Warner, M.D.**

Department of Anesthesiology  
Duke University Medical Center  
Box 3094  
Durham, North Carolina 27710  
Warne002@mc.duke.edu

**Reference**

1. Guy J, Hindman BJ, Baker KZ, Borel CO, Maktabi M, Ostapovich N, Kirchner J, Todd MM, Fogarty-Mack P, Yancy V, Sokoll MD, McAllister A, Roland C, Young WL, Warner DS: Comparison of remifentanyl and fentanyl in patients undergoing craniotomy for supratentorial space-occupying lesions. *ANESTHESIOLOGY* 1997; 86:514-24

(Accepted for publication August 6, 1997.)

The editorial review for these letters was conducted by Lawrence J. Saidman, M.D.

Anesthesiology

1998; 88:272

© 1998 American Society of Anesthesiologists, Inc.

Lippincott-Raven Publishers

## The Risks of Central Neuraxial Anesthesia

*To the Editor:*—Ho *et al.*<sup>1</sup> report on the successful use of combined spinal and epidural anesthesia for the management of labor and delivery in a patient with idiopathic hypertrophic subaortic stenosis (IHSS).

Idiopathic hypertrophic subaortic stenosis, or hypertrophic obstructive cardiomyopathy (HOCM) as it also is known, is a cardiomyopathy characterized by asymmetric septal hypertrophy, and dynamic left ventricular outflow tract (LVOT) obstruction, which worsens with hypovolemia, increased left ventricular contractility, and vascular dilation.<sup>2</sup> The diagnosis is confirmed with two-dimensional echocardiography, and the LVOT gradient is quantified by Doppler echocardiography. Provocative testing with inhaled amyl nitrate is used to accentuate the gradient.

In the current case, the diagnosis of IHSS was made several years before pregnancy, but we are given no details regarding its severity; specifically, no mention is made of a "provoked" gradient at diagnosis. Without this information, the reader has no way of knowing what the severity of the condition was and therefore no way of knowing the risks of sympathetic blockade with neuraxial anesthesia. For the patient with the potential for severe LVOT obstruction, the risks of central neuraxial anesthesia are profound and should never be underestimated.

**Donald Oxorn, M.D., C.M., F.R.C.P.C.**

Department of Anaesthesia and the Division of  
Cardiology  
Sunnybrook Health Science Centre and the University  
of Toronto  
2075 Bayview Avenue  
Toronto, Ontario M4N 3M5  
Canada  
donald.oxorn@utoronto.ca

**References**

1. Ho KM, Ngan Kee WD, Poon MCM: Combined spinal and epidural anesthesia in a parturient with idiopathic hypertrophic subaortic stenosis. *ANESTHESIOLOGY* 1997; 87:168-9
2. Grigg LE, Wigle ED, Williams WG, Daniel LB, Rakowski H: Transesophageal Doppler echocardiography in obstructive hypertrophic cardiomyopathy: Clarification of pathophysiology and importance in intraoperative decision making. *J Am Coll Cardiol* 1992; 20:42-52

(Accepted for publication September 4, 1997.)

Anesthesiology

1998; 88:272-3

© 1998 American Society of Anesthesiologists, Inc.

Lippincott-Raven Publishers

*In Reply:*—We thank Dr. Oxorn for his interest in our report. During pregnancy, our patient's mild limitation of exercise tolerance remained essentially unchanged, and echocardiography showed a left ventricular outflow tract gradient of 15 mmHg.

Although the response to amyl nitrite may provide some measure of severity, its use is not universal, it is not commonly used in our institution, and there are few data to support its safe use in pregnancy. We concur with Dr. Oxorn that hypovolemia, in-
